# Supplementary material for: Design and characterization of antithrombotic ClEKnsTy-Au nanoparticles as diagnostic and therapeutic reagents
Source: Royal Society of Chemistry journal article supplement (doi:10.1039/d3cp01000g), 2023-01-01
Supplement: d3cp01000g1.pdf [file d3cp01000g1.pdf]

## Supporting Information

# Design and characterization of antithrombotic ClEKnsTy-Au nanoparticles as diagnostic and therapeutic reagents

*Chen Xie, Lin Zhang\**

Department of Biochemical Engineering and Key Laboratory of Systems Bioengineering of the Ministry of Education, School of Chemical Engineering and Technology, Tianjin University, Tianjin 300350, People's Republic of China

## Corresponding Author

\*Tel: +86 22 27403389. Fax: +86 22 27403389. E-mail: [linzhang@tju.edu.cn](mailto:linzhang@tju.edu.cn).

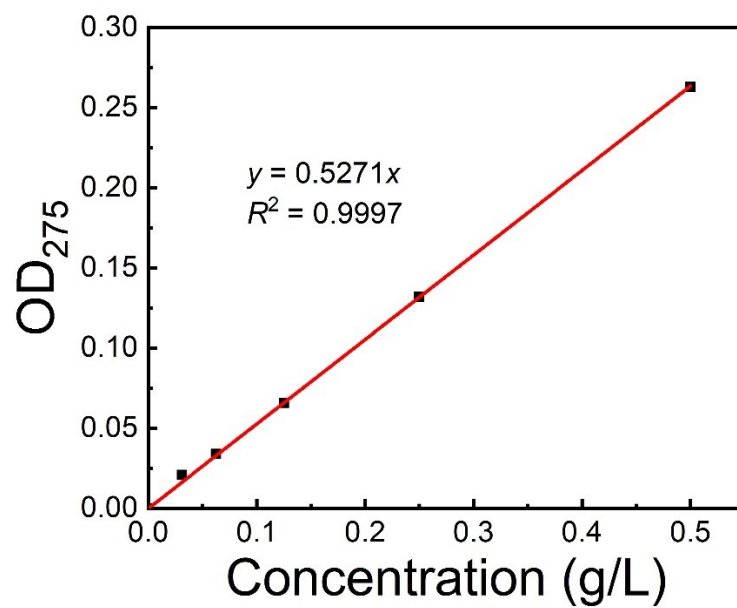

**Figure S1.** Calibration curve of CLEKnsTy. The linear fitting is shown in red.
